# Supplementary material for: Plant Growth-Promoting Nitrogen-Fixing Enterobacteria Are in Association with Sugarcane Plants Growing in Guangxi, China
Source: PubMed Central journal article supplement (PMC4103546; doi:10.1264/jsme2.me11275), 2012-04-18
Supplement: 27_391_s1.pdf [file 27_391_s1.pdf]

**Table S1.** Accession numbers for partial *nifH*, *anfH*, and *rrs* sequences of nitrogen-fixing bacterial isolates associated with sugarcane cultivar ROC22 grown in Guangxi

| Isolate name | Genus affiliation   | Accession no. for partial <i>nifH</i> sequences | Accession no. for partial <i>anfH</i> sequences | Accession no. for partial <i>rrs</i> sequences |
|--------------|---------------------|-------------------------------------------------|-------------------------------------------------|------------------------------------------------|
| CZ150S       | <i>Klebsiella</i>   | HQ204222                                        |                                                 | HQ204277                                       |
| CZ152S       | <i>Burkholderia</i> | HQ204223                                        |                                                 | HQ204278                                       |
| CZ186S       | <i>Klebsiella</i>   | HQ204224                                        |                                                 | HQ204279                                       |
| GG164S       | <i>Klebsiella</i>   | HQ204225                                        |                                                 | HQ204280                                       |
| HX148S       | <i>Enterobacter</i> | HQ204226                                        |                                                 | HQ204281                                       |
| HX149S       | <i>Klebsiella</i>   | HQ204227                                        |                                                 | HQ204282                                       |
| LA16S        | <i>Klebsiella</i>   | HQ204228                                        |                                                 | HQ204283                                       |
| LC55S        | <i>Klebsiella</i>   | HQ204229                                        |                                                 | HQ204284                                       |
| NN145S       | <i>Enterobacter</i> | HQ204230                                        |                                                 | HQ204285                                       |
| NN169S       | <i>Klebsiella</i>   | HQ204231                                        |                                                 | HQ204286                                       |
| PG132S       | <i>Enterobacter</i> | HQ204232                                        |                                                 | HQ204287                                       |
| QZ25S        | <i>Enterobacter</i> | HQ204233                                        |                                                 | HQ204288                                       |
| QZ33S        | <i>Klebsiella</i>   | HQ204234                                        |                                                 | HQ204289                                       |
| TD153S       | <i>Klebsiella</i>   | HQ204235                                        |                                                 | HQ204290                                       |
| YL34S        | <i>Enterobacter</i> | HQ204236                                        | HQ204265                                        | HQ204291                                       |
| YX115S       | <i>Klebsiella</i>   | HQ204237                                        |                                                 | HQ204292                                       |
| YX116S       | <i>Klebsiella</i>   | HQ204238                                        |                                                 | HQ204293                                       |
| YX117S       | <i>Klebsiella</i>   | HQ204239                                        |                                                 | HQ204294                                       |
| YX118S       | <i>Klebsiella</i>   | HQ204240                                        |                                                 | HQ204295                                       |
| DX120E       | <i>Klebsiella</i>   | HQ204241                                        |                                                 | HQ204296                                       |
| DX194E       | <i>Klebsiella</i>   | HQ204242                                        |                                                 | HQ204297                                       |
| GG41E        | <i>Klebsiella</i>   | HQ204243                                        | HQ204266                                        | HQ204298                                       |
| GG42E        | <i>Klebsiella</i>   | HQ204244                                        | HQ204267                                        | HQ204299                                       |
| GG49E        | <i>Enterobacter</i> | HQ204245                                        |                                                 | HQ204300                                       |
| GG50E        | <i>Klebsiella</i>   | HQ204246                                        | HQ204268                                        | HQ204301                                       |
| GG53E        | <i>Klebsiella</i>   | HQ204247                                        | HQ204269                                        | HQ204302                                       |
| GG160E       | <i>Klebsiella</i>   | HQ204248                                        |                                                 | HQ204303                                       |
| GG165E       | <i>Enterobacter</i> | HQ204249                                        | HQ204270                                        | HQ204304                                       |
| LC89E        | <i>Klebsiella</i>   | HQ204250                                        |                                                 | HQ204305                                       |
| LZ83E        | <i>Klebsiella</i>   | HQ204251                                        | HQ204271                                        | HQ204306                                       |
| LZ84E        | <i>Enterobacter</i> | HQ204252                                        | HQ204272                                        | HQ204307                                       |
| LZ87E        | <i>Klebsiella</i>   | HQ204253                                        |                                                 | HQ204308                                       |
| LA3E         | <i>Klebsiella</i>   | HQ204254                                        |                                                 | HQ204309                                       |
| LA4E         | <i>Enterobacter</i> | HQ204255                                        | HQ204273                                        | HQ204310                                       |
| LA11E        | <i>Klebsiella</i>   | HQ204256                                        | HQ204274                                        | HQ204311                                       |
| LA14E        | <i>Enterobacter</i> | HQ204257                                        |                                                 | HQ204312                                       |
| NN143E       | <i>Enterobacter</i> | HQ204258                                        |                                                 | HQ204313                                       |
| NN144E       | <i>Enterobacter</i> | HQ204259                                        |                                                 | HQ204314                                       |
| NN208E       | <i>Enterobacter</i> | HQ204260                                        |                                                 | HQ204315                                       |
| PG122E       | <i>Klebsiella</i>   | HQ204261                                        |                                                 | HQ204316                                       |
| QZ80E        | <i>Enterobacter</i> | HQ204262                                        | HQ204275                                        | HQ204317                                       |
| SS107E       | <i>Klebsiella</i>   | HQ204263                                        |                                                 | HQ204318                                       |
| SS82E        | <i>Klebsiella</i>   | HQ204264                                        | HQ204276                                        | HQ204319                                       |

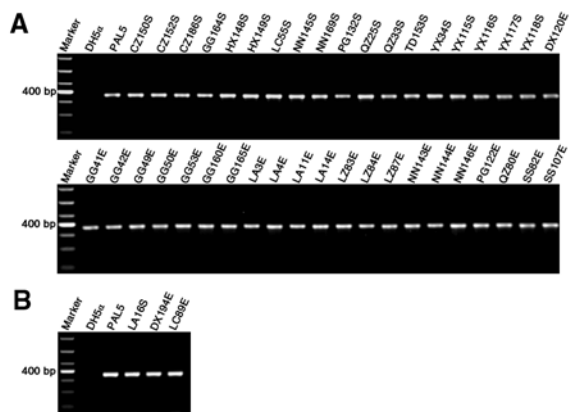

**Fig. S1.** 2% agarose gel electrophoresis for products of *nifH* PCR based on Z-primers from colonies of 40 ARA-positive isolates (A) and from colonies of isolate LA16S, DX194E, and LC89E (B). *E. coli* DH5 $\alpha$  and *G. diazotrophicus* PAL5 were respectively used as negative and positive control.
